# Supplementary material for: Evaluation of Anti-Inflammatory Activities of a Triterpene β-Elemonic Acid in Frankincense In Vivo and In Vitro
Source: MDPI journal article supplement (doi:10.3390/molecules24061187), 2019-03-26
Supplement: s1 [file s1]

# Evaluation of anti-inflammatory activities of a triterpene

## $\beta$ -elemonic acid in Frankincense *in vivo* and *in vitro*

Yue Zhang<sup>1,2†</sup>, Ying-li Yu<sup>1,2†</sup>, Hua Tian<sup>1</sup>, Ru-yu Bai<sup>1</sup>, Ya-nan Bi<sup>1</sup>, Xiao-mei Yuan<sup>1</sup>, Li-kang Sun<sup>1,2</sup>, Yan-ru Deng<sup>3\*</sup>, Kun Zhou<sup>1,2,4\*</sup>

<sup>1</sup> Institute of Traditional Chinese Medicine, Tianjin University of Traditional Chinese Medicine, 10 Poyang lake Road, Jinghai District, Tianjin 301617, China, [z.k.ken@263.net](mailto:z.k.ken@263.net)(K. Zhou)

<sup>2</sup> Tianjin Key Laboratory of Chinese medicine Pharmacology, 10 Poyang lake Road, Jinghai District, Tianjin 301617, China, [z.k.ken@263.net](mailto:z.k.ken@263.net) (K. Zhou)

<sup>3</sup> School of Chinese Materia Medica, Tianjin University of Traditional Chinese Medicine, 10 Poyang lake Road, Jinghai District, Tianjin 301617, China, [dyanru@sina.com](mailto:dyanru@sina.com) (Y.R. Deng)

<sup>4</sup> Ministry of Education Key Laboratory of Traditional Chinese Medical Formulae, Tianjin University of Traditional Chinese Medicine, 10 Poyang lake Road, Jinghai District, Tianjin 301617, China, [z.k.ken@263.net](mailto:z.k.ken@263.net)(K. Zhou)

† These authors contributed equally to this work. \* Correspondence: [z.k.ken@263.net](mailto:z.k.ken@263.net); Tel./Fax: +86-22-5959-6163(K. Zhou); [dyanru@sina.com](mailto:dyanru@sina.com); Tel./Fax: +86-22-5959-6225 (Y.R. Deng)

### Supplementary Materials:

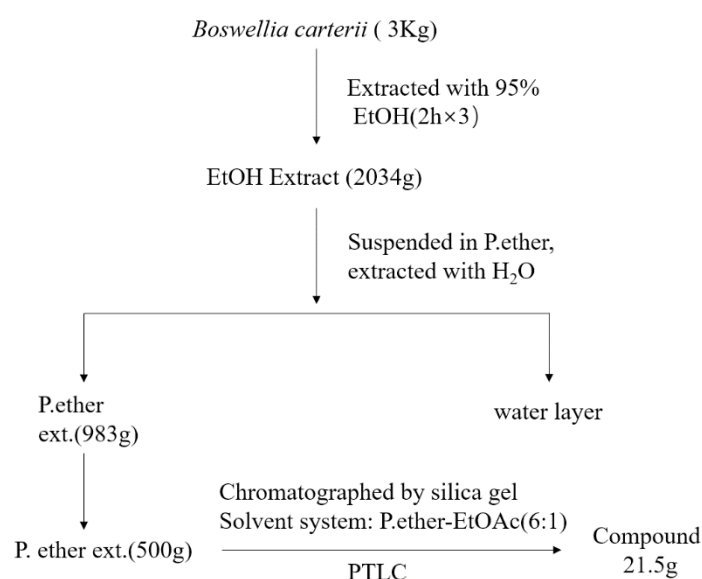

**Figure S1.** Isolation of the compound from frankincense.
